# Supplementary material for: Darolutamide is a potent androgen receptor antagonist with strong efficacy in prostate cancer models
Source: PubMed Central journal article supplement — Int J Cancer. 2019 Mar 23;145(5):1382–94. doi: 10.1002/ijc.32242 (PMC6766977; doi:10.1002/ijc.32242), 2019-03-23
Supplement: IJC-145-1382-s001.pdf [file IJC-145-1382-s001.pdf]

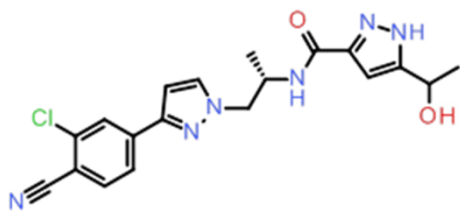

darolutamide  
(399)

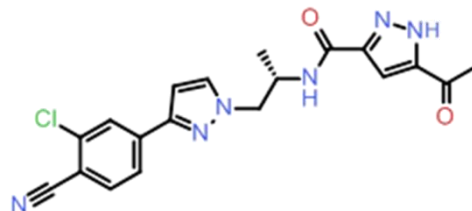

keto-darolutamide  
(397)

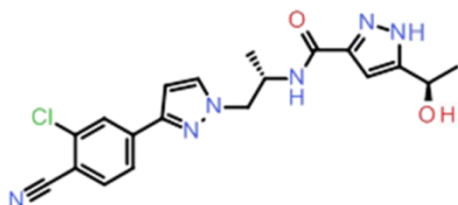

(*S,R*)-darolutamide  
(399)

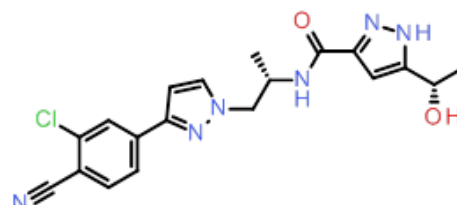

(*S,S*)-darolutamide  
(399)

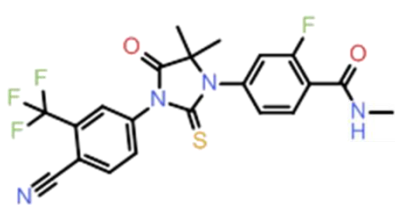

enzalutamide  
(464)

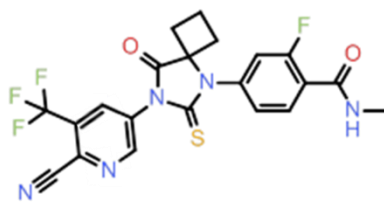

apalutamide  
(477)

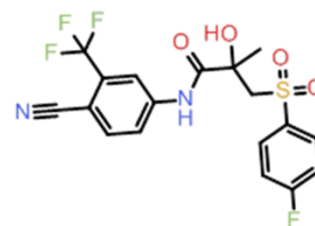

bicalutamide  
(430)

**Supplementary Figure 1.** Chemical structure of darolutamide and derivatives, and of the other AR antagonists analyzed. The molecular weight of each compound is indicated in parentheses.

## VCaP

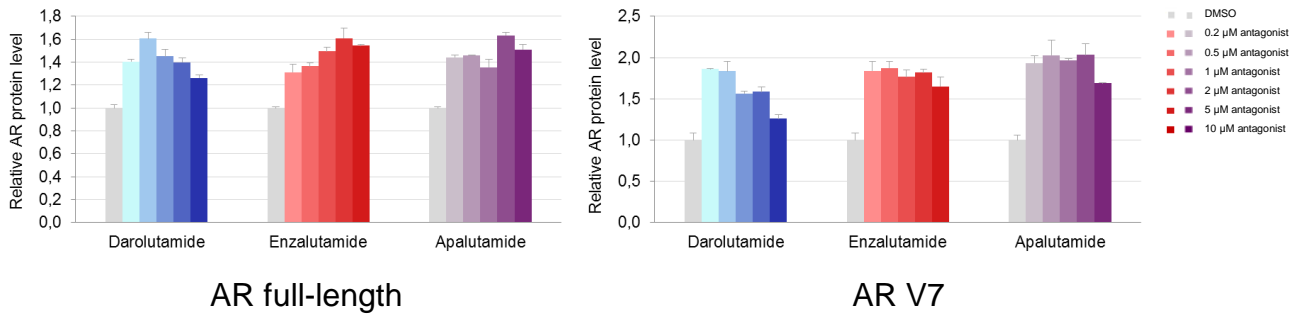

## LAPC-4

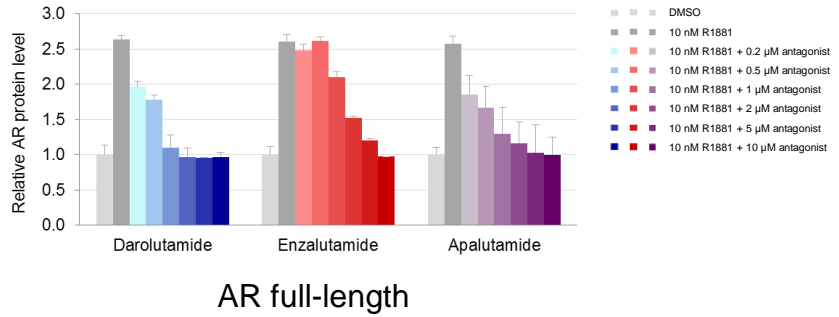

**Supplementary Figure 2.** Impact of AR antagonists on AR protein levels. Lysates of cells treated with different AR antagonist concentrations were analyzed using a sandwich AR ELISA kit.

**a****LAPC-4**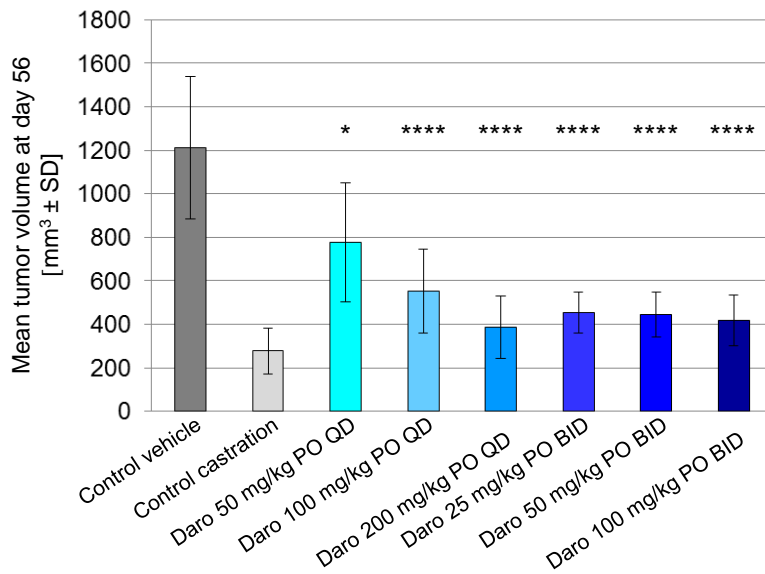**b****KuCaP-1**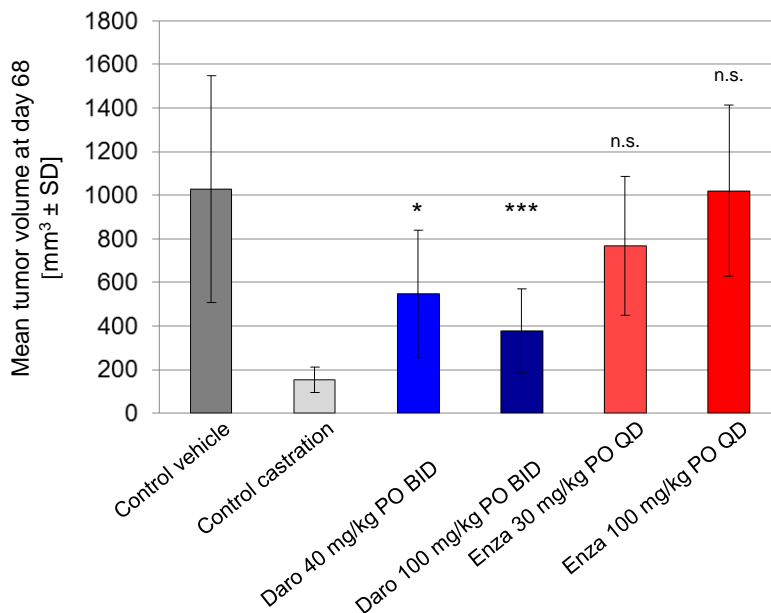

**Supplementary Figure 3.** (a) *In vivo* efficacy in LAPC-4 model. Mean tumor volume  $\pm$  SD at day 56 is shown. Significance vs. control vehicle group was determined at day 56 using one-way ANOVA with Dunnett's post hoc test on Log-transformed tumor volumes: \*,  $p = 0.04$ ; \*\*\*\*,  $p = 0.0001$ . (b) *In vivo* efficacy in KuCaP-1 model. Mean tumor volume  $\pm$  SD at day 68 is shown. Significance vs. control vehicle group was determined at day 68 using one-way ANOVA with Dunnett's post hoc test on Log-transformed tumor volumes: \*,  $p = 0.0169$ ; \*\*\*,  $p = 0.0001$ , n.s.: not significant. Daro: darolutamide, Enza: enzalutamide.

| <b>Primer</b> | <b>Sequence (5'-3')</b>  |
|---------------|--------------------------|
| KLK3 forward  | CAAACCTGCTCAGCCTTTGTC    |
| KLK3 reverse  | TGTTCCCTCCAGAGTAGGTCTGTT |
| FKBP5 forward | GAGGCTGCCTGGGCTTC        |
| FKBP5 reverse | AGAACCTCGTGTTCCAGCAA     |
| FEZ1 forward  | GAGGCTCCTCGTTGATACCG     |
| FEZ1 reverse  | CCACCTCCTCTCCAGATCCA     |

**Supplementary Table 1.** Primers used for ChIP-qPCR analysis.

| Compound     | R1881 (nM) | V731M       | H875Y                    | F877L                   | T878A                   |
|--------------|------------|-------------|--------------------------|-------------------------|-------------------------|
| Darolutamide | 0.1        | 90 ± 30     | 200 ± 90                 | 140 ± 30                | 1540 ± 90               |
|              | 1          | 570 ± 180   | 1740 ± 530               | 850 ± 190               | 9830 ± 300              |
|              | 10         | 7160 ± 2640 | >10000                   | 7200 ± 2150             | >10000                  |
| Enzalutamide | 0.1        | 120 ± 20    | 320 ± 120                | <b>Agonism</b>          | 130 ± 10 <sup>2</sup>   |
|              | 1          | 740 ± 160   | 3050 ± 1360              | <b>20 ± 10%</b>         | 720 ± 420 <sup>2</sup>  |
|              | 10         | 8510 ± 1830 | >10000                   |                         | >10000                  |
| Apalutamide  | 0.1        | 120 ± 10    | 140 ± 70                 | <b>Agonism</b>          | 310 ± 40 <sup>2</sup>   |
|              | 1          | 740 ± 280   | 1430 ± 350               | <b>40 ± 10%</b>         | 1120 ± 760              |
|              | 10         | 7360 ± 1790 | >10000                   |                         | >10000                  |
| Bicalutamide | 0.1        | 210 ± 140   | 960 ± 280 <sup>1</sup>   | 430 ± 120 <sup>1</sup>  | 860 ± 260               |
|              | 1          | 1350 ± 690  | 7610 ± 2930 <sup>1</sup> | 2140 ± 320 <sup>1</sup> | 3410 ± 290 <sup>2</sup> |
|              | 10         | 9470 ± 580  | >10000                   | >10000 <sup>1</sup>     | >10000                  |

| Compound     | R1881 (nM) | I882L      | M896T                    | M896V                   |
|--------------|------------|------------|--------------------------|-------------------------|
| Darolutamide | 0.1        | 30 ± 10    | n.d.                     | 50 ± 10                 |
|              | 1          | 110 ± 20   | 50 ± 20                  | 240 ± 60                |
|              | 10         | 1270 ± 400 | 330 ± 230                | 2840 ± 1740             |
| Enzalutamide | 0.1        | 40 ± 10    | n.d.                     | 480 ± 270 <sup>1</sup>  |
|              | 1          | 170 ± 40   | 470 ± 140 <sup>1</sup>   | 1270 ± 590 <sup>1</sup> |
|              | 10         | 1760 ± 490 | 2590 ± 1280 <sup>1</sup> | >10000 <sup>1</sup>     |
| Apalutamide  | 0.1        | 40 ± 10    | n.d.                     | 50 ± 5                  |
|              | 1          | 170 ± 30   | 200 ± 50 <sup>1</sup>    | 260 ± 40                |
|              | 10         | 1710 ± 170 | 1210 ± 370 <sup>1</sup>  | 2930 ± 1030             |
| Bicalutamide | 0.1        | 90 ± 10    | <b>Agonism</b>           | <b>Agonism</b>          |
|              | 1          | 330 ± 10   | <b>50 ± 10%</b>          | <b>60 ± 10%</b>         |
|              | 10         | 3140 ± 620 |                          |                         |

**Supplementary Table 2.** Transactivation assays for AR mutants. Mean IC<sub>50</sub> ± SD values from 3 to 6 biological replicates are given in nM. Cells were treated with the indicated R1881 concentrations (in nM) and the mentioned AR antagonist. In some cases agonism was found and the % activity measured in the presence of 1 μM compound, in comparison to 1 nM R1881 treatment which was set to 100%, is given in bold. Statistical analysis was performed with t-test on average pIC<sub>50</sub> values. Superscripts indicate antagonism significantly lower<sup>1</sup> or higher<sup>2</sup> compared to darolutamide. Abbreviation: n.d., not determined.

| Compound                    | AR wild-type            | AR W742C                | AR W742L                 |
|-----------------------------|-------------------------|-------------------------|--------------------------|
| Darolutamide                | 600 ± 80                | 550 ± 90                | 910 ± 170                |
| ( <i>S,R</i> )-darolutamide | 550 ± 20                | 500 ± 30                | 780 ± 180                |
| ( <i>S,S</i> )-darolutamide | 740 ± 40                | 600 ± 70                | 1000 ± 250               |
| Keto-darolutamide           | 630 ± 60                | 480 ± 40                | 1130 ± 380               |
| Enzalutamide                | 930 ± 170 <sup>1</sup>  | 2340 ± 310 <sup>1</sup> | 6190 ± 1020 <sup>1</sup> |
| Apalutamide                 | 800 ± 210               | 1410 ± 340 <sup>1</sup> | 3910 ± 1950 <sup>1</sup> |
| Bicalutamide                | 1430 ± 130 <sup>1</sup> | <b>Ago: 90 ± 20%</b>    | <b>Ago: 50 ± 10%</b>     |

**Supplementary Table 3.** Effects of AR antagonists on AR wild-type and mutant N/C interaction. Mean IC<sub>50</sub> ±SD values from at least 2 biological replicates are given in nM. Cells were treated with 10 nM R1881. In case agonistic activity was observed, the value is shown in bold and gives the % activity measured with 10 μM compound only, in comparison to treatment with 10 nM R1881 which was set to 100 %. Statistical analysis was performed with t-test on average pIC<sub>50</sub> values. A superscript indicates inhibitory activity that is significantly lower than that of darolutamide. Ago: agonism.
